# Supplementary material for: Theoretically exploring the key role of the Lys412 residue in the conversion of N2O to N2by nitrous oxide reductase from Achromobacter cycloclastes
Source: Royal Society of Chemistry journal article supplement (doi:10.1039/c5nj01339a), 2015-01-01
Supplement: c5nj01339a1.pdf [file c5nj01339a1.pdf]

## Supporting Information For

# Theoretical Exploring the Key Role of Residue Lys412 in the Conversion of N<sub>2</sub>O to N<sub>2</sub> by Nitrous Oxide Reductase from *Achromobacter Cycloclaste*

Hujun Xie\*<sup>a</sup> Chengcheng Liu<sup>a</sup> Xuelin Chen<sup>a</sup> Qunfang Lei<sup>b</sup> Wenjun Fang<sup>b</sup> and Tao Zhou\*<sup>a</sup>

<sup>a</sup> Department of Applied Chemistry, School of Food Science and Biotechnology, Zhejiang Gongshang University, Hangzhou 310018, People's Republic of China. E-mail: [hujunxie@gmail.com](mailto:hujunxie@gmail.com); [taozhou@zjgsu.edu.cn](mailto:taozhou@zjgsu.edu.cn).

<sup>b</sup> Department of Chemistry, Zhejiang University, Hangzhou 310027, People's Republic of China.

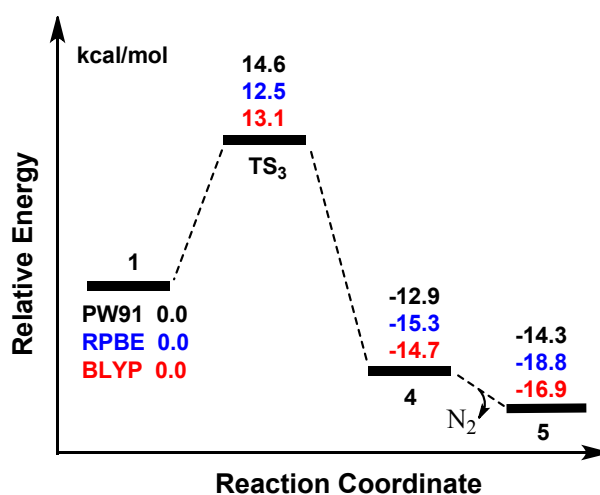

**Fig. S1** The potential energy profiles for the N<sub>2</sub>O reduction in Path A of nitrous oxide reductase in the protein environment calculated by PW91, RPBE and BLYP functionals.

### Cartesian coordinates and electronic energies for all of the calculated structures

|           |              |         |        |   |         |         |        |
|-----------|--------------|---------|--------|---|---------|---------|--------|
| <b>1</b>  |              |         |        | N | 2.2245  | 1.5989  | 4.6319 |
| SCF done: | -3346.550408 |         |        | C | 1.7233  | -0.3175 | 3.7178 |
| C         | -1.7146      | 0.3573  | 4.5238 | C | 1.9116  | 1.8180  | 3.3309 |
| C         | -2.8914      | 0.5944  | 3.6520 | N | 1.5994  | 0.6631  | 2.7472 |
| N         | -2.8720      | 1.2834  | 2.4840 | H | 1.5595  | -0.0316 | 6.9591 |
| C         | -4.2780      | 0.3080  | 3.9382 | H | 3.3000  | -0.0849 | 6.6594 |
| C         | -4.2036      | 1.3844  | 2.1186 | H | 2.5282  | 2.3102  | 5.2919 |
| N         | -5.0629      | 0.8243  | 2.9912 | H | 1.5182  | -1.3589 | 3.5069 |
| H         | -1.7022      | 1.0992  | 5.3394 | H | 1.9170  | 2.7922  | 2.8614 |
| H         | -0.7745      | 0.4399  | 3.9726 | C | -0.7236 | 6.5603  | 3.8468 |
| H         | -4.6794      | -0.1860 | 4.8189 | C | -0.7095 | 5.4990  | 2.8170 |
| H         | -4.5207      | 1.9560  | 1.2531 | N | -0.2129 | 5.6744  | 1.5352 |
| C         | 2.3224       | -0.3557 | 6.2388 | C | -1.1602 | 4.2031  | 2.8415 |
| C         | 2.1083       | 0.2467  | 4.9075 | C | -0.3646 | 4.5227  | 0.8377 |

|    |         |         |         |                        |         |         |         |
|----|---------|---------|---------|------------------------|---------|---------|---------|
| N  | -0.9355 | 3.6054  | 1.6140  | H                      | -5.0702 | -4.7999 | -5.1110 |
| H  | -1.4003 | 7.3801  | 3.5730  | H                      | 3.0415  | -4.6604 | -2.0189 |
| H  | 0.2734  | 6.9923  | 4.0045  | N                      | -0.1077 | -0.9334 | -3.1137 |
| H  | 0.1684  | 6.5425  | 1.1682  | N                      | -1.0842 | -1.5426 | -2.8473 |
| H  | -1.6509 | 3.6778  | 3.6502  |                        |         |         |         |
| H  | -0.0596 | 4.3867  | -0.1912 | <b>2</b>               |         |         |         |
| C  | 3.3134  | 4.2293  | -5.7882 | SCF done: -3346.549645 |         |         |         |
| C  | 2.3271  | 3.5602  | -4.9192 | C                      | -1.7841 | 0.3705  | 4.5458  |
| N  | 1.0061  | 3.9497  | -4.7828 | C                      | -2.9863 | 0.6332  | 3.7179  |
| C  | 2.4531  | 2.4624  | -4.1082 | N                      | -2.9682 | 1.2530  | 2.5122  |
| C  | 0.3847  | 3.1059  | -3.9226 | C                      | -4.3658 | 0.3576  | 4.0143  |
| N  | 1.2486  | 2.1896  | -3.4918 | C                      | -4.3014 | 1.3375  | 2.1395  |
| H  | 3.0076  | 4.2091  | -6.8430 | N                      | -5.1531 | 0.8017  | 3.0230  |
| H  | 4.2788  | 3.7218  | -5.7148 | H                      | -1.6840 | 1.1380  | 5.3297  |
| H  | 0.5687  | 4.7277  | -5.2693 | H                      | -0.8718 | 0.3743  | 3.9422  |
| H  | 3.3298  | 1.8502  | -3.9498 | H                      | -4.7688 | -0.1197 | 4.9038  |
| H  | -0.6600 | 3.1820  | -3.6489 | H                      | -4.6184 | 1.8309  | 1.2265  |
| C  | 5.5144  | -2.3597 | -4.0842 | C                      | 2.2529  | -0.3425 | 6.2608  |
| C  | 4.5811  | -1.4789 | -3.3369 | C                      | 2.0208  | 0.2466  | 4.9164  |
| N  | 4.9923  | -0.5972 | -2.3503 | N                      | 2.1132  | 1.6024  | 4.6451  |
| C  | 3.2180  | -1.3023 | -3.4106 | C                      | 1.6640  | -0.3187 | 3.7153  |
| C  | 3.9098  | 0.0708  | -1.8738 | C                      | 1.8067  | 1.8226  | 3.3430  |
| N  | 2.8125  | -0.3398 | -2.5017 | N                      | 1.5262  | 0.6654  | 2.7464  |
| H  | 4.9598  | -2.9754 | -4.7980 | H                      | 1.5059  | 0.0008  | 6.9869  |
| H  | 6.0652  | -3.0343 | -3.4154 | H                      | 3.2450  | -0.0798 | 6.6483  |
| H  | 5.9546  | -0.4480 | -2.0593 | H                      | 2.3911  | 2.3172  | 5.3128  |
| H  | 2.5131  | -1.7907 | -4.0718 | H                      | 1.4810  | -1.3619 | 3.4927  |
| H  | 3.9625  | 0.8292  | -1.1026 | H                      | 1.7944  | 2.8000  | 2.8799  |
| C  | 2.2554  | -4.7087 | -1.2522 | C                      | -0.7931 | 6.5735  | 3.8688  |
| C  | 2.2581  | -3.5045 | -0.3947 | C                      | -0.7808 | 5.5157  | 2.8485  |
| N  | 3.3159  | -3.1287 | 0.4166  | N                      | -0.3438 | 5.6988  | 1.5488  |
| C  | 1.3256  | -2.5129 | -0.2305 | C                      | -1.1819 | 4.2078  | 2.9085  |
| C  | 3.0086  | -1.9577 | 1.0271  | C                      | -0.4817 | 4.5363  | 0.8683  |
| N  | 1.7973  | -1.5567 | 0.6466  | N                      | -0.9855 | 3.6106  | 1.6803  |
| H  | 1.2951  | -4.8009 | -1.7665 | H                      | -1.4848 | 7.3826  | 3.6007  |
| H  | 2.4133  | -5.6310 | -0.6768 | H                      | 0.1982  | 7.0230  | 4.0122  |
| H  | 4.1710  | -3.6598 | 0.5579  | H                      | -0.0133 | 6.5777  | 1.1590  |
| H  | 0.3544  | -2.4253 | -0.6974 | H                      | -1.6249 | 3.6783  | 3.7421  |
| H  | 3.6655  | -1.4444 | 1.7176  | C                      | -0.2213 | 4.3957  | -0.1719 |
| C  | -5.0376 | -4.6437 | -4.0272 | H                      | 3.2439  | 4.2425  | -5.7662 |
| C  | -4.1079 | -3.4976 | -3.7132 | C                      | 2.3601  | 3.4826  | -4.8492 |
| N  | -4.0401 | -3.2357 | -2.2208 | N                      | 0.9790  | 3.5789  | -4.8447 |
| H  | -6.0672 | -4.4415 | -3.7037 | C                      | 2.6467  | 2.5710  | -3.8621 |
| H  | -4.7020 | -5.5830 | -3.5703 | C                      | 0.4784  | 2.7526  | -3.8933 |
| H  | -3.0787 | -3.7018 | -4.0264 | N                      | 1.4767  | 2.1251  | -3.2772 |
| H  | -4.4282 | -2.5593 | -4.1762 | H                      | 3.0421  | 3.9985  | -6.8173 |
| H  | -3.2449 | -2.5665 | -1.9965 | H                      | 4.2897  | 4.0004  | -5.5603 |
| H  | -3.8784 | -4.1148 | -1.7135 | H                      | 0.4270  | 4.1594  | -5.4709 |
| H  | -4.9239 | -2.8498 | -1.8623 | H                      | 3.6182  | 2.2087  | -3.5543 |
| C  | -1.9826 | -2.7737 | 1.8988  | H                      | -0.5770 | 2.6290  | -3.6891 |
| C  | -3.2659 | -2.1361 | 1.5096  | C                      | 5.4449  | -2.3465 | -4.0622 |
| N  | -3.3454 | -1.1372 | 0.5932  | C                      | 4.7203  | -1.4015 | -3.1765 |
| C  | -4.6126 | -2.4653 | 1.8631  | N                      | 5.3395  | -0.5482 | -2.2766 |
| C  | -4.6962 | -0.8831 | 0.4489  | C                      | 3.3803  | -1.1351 | -3.0399 |
| N  | -5.4781 | -1.6969 | 1.1787  | C                      | 4.3941  | 0.1901  | -1.6408 |
| H  | -2.0731 | -3.2796 | 2.8660  | N                      | 3.1857  | -0.1487 | -2.0860 |
| H  | -1.1732 | -2.0344 | 1.9600  | H                      | 4.7335  | -2.8963 | -4.6849 |
| H  | -4.9439 | -3.2258 | 2.5647  | H                      | 6.0320  | -3.0783 | -3.4913 |
| H  | -5.0770 | -0.1441 | -0.2493 | H                      | 6.3432  | -0.4652 | -2.1377 |
| S  | -0.2850 | 1.1452  | -0.6455 | H                      | 2.5487  | -1.5753 | -3.5738 |
| O  | -1.8930 | -1.5687 | -1.7858 | H                      | 4.6176  | 0.9432  | -0.8963 |
| Cu | -1.4541 | 1.7407  | 1.1964  | C                      | 2.1859  | -4.6955 | -1.2302 |
| Cu | -1.8668 | -0.2515 | -0.2282 | C                      | 2.2477  | -3.5020 | -0.3638 |
| Cu | 0.9451  | 0.5064  | -2.4493 | N                      | 3.3342  | -3.1462 | 0.4172  |
| Cu | 0.9301  | 0.2303  | 0.9473  | C                      | 1.3408  | -2.4929 | -0.1782 |
| H  | 3.4669  | 5.2800  | -5.5085 | C                      | 3.0694  | -1.9640 | 1.0281  |
| H  | 6.2543  | -1.7782 | -4.6494 | N                      | 1.8582  | -1.5404 | 0.6766  |
| H  | -1.0666 | 6.1531  | 4.8021  | H                      | 1.2081  | -4.7538 | -1.7157 |
| H  | 2.2805  | -1.4463 | 6.1724  | H                      | 2.3356  | -5.6285 | -0.6704 |
| H  | -1.7746 | -0.6258 | 5.0063  | H                      | 4.1788  | -3.6976 | 0.5444  |
| H  | -1.6738 | -3.5350 | 1.1669  | H                      | 0.3561  | -2.3952 | -0.6136 |

|    |         |         |         |
|----|---------|---------|---------|
| H  | 3.7511  | -1.4604 | 1.7014  |
| C  | -5.1071 | -4.6305 | -4.0052 |
| C  | -4.2074 | -3.4457 | -3.7541 |
| N  | -4.0580 | -3.1876 | -2.2723 |
| H  | -6.1299 | -4.4513 | -3.6503 |
| H  | -4.7225 | -5.5404 | -3.5286 |
| H  | -3.1944 | -3.6119 | -4.1366 |
| H  | -4.5958 | -2.5241 | -4.1990 |
| H  | -3.3276 | -2.4693 | -2.0943 |
| H  | -3.7818 | -4.0470 | -1.7814 |
| H  | -4.9280 | -2.8692 | -1.7933 |
| C  | -2.0521 | -2.7605 | 1.9208  |
| C  | -3.2408 | -2.2918 | 1.1557  |
| N  | -3.2458 | -1.1484 | 0.3968  |
| C  | -4.5203 | -2.8617 | 1.0195  |
| C  | -4.5124 | -1.0591 | -0.1238 |
| N  | -5.2976 | -2.0929 | 0.1991  |
| H  | -2.3571 | -3.4439 | 2.7202  |
| H  | -1.5172 | -1.9136 | 2.3676  |
| H  | -4.9071 | -3.7596 | 1.4927  |
| H  | -4.8311 | -0.2362 | -0.7564 |
| S  | -0.2788 | 1.4144  | -0.5244 |
| Cu | -1.5203 | 1.7586  | 1.3258  |
| Cu | -1.7816 | -0.1380 | -0.2723 |
| Cu | 1.4030  | 0.7128  | -1.8335 |
| Cu | 1.0286  | 0.2525  | 0.8430  |
| H  | 3.1182  | 5.3255  | -5.6415 |
| H  | 6.1346  | -1.8193 | -4.7341 |
| H  | -1.1213 | 6.1686  | 4.8303  |
| H  | 2.1940  | -1.4336 | 6.2073  |
| H  | -1.8722 | -0.5906 | 5.0673  |
| H  | -1.3383 | -3.3071 | 1.2853  |
| H  | -5.1645 | -4.8244 | -5.0816 |
| H  | 2.9494  | -4.6581 | -2.0200 |
| N  | -0.8188 | -1.1855 | -2.8151 |
| N  | -1.7147 | -1.2464 | -2.0404 |
| O  | 0.2780  | -0.6841 | -3.0743 |

**TS<sub>3</sub>**

SCF done: -3346.527161

|   |        |         |         |
|---|--------|---------|---------|
| C | 4.4237 | -0.4826 | 1.5374  |
| C | 4.6830 | 0.1247  | 0.2023  |
| N | 3.7703 | 0.2939  | -0.7152 |
| C | 5.9699 | 0.7231  | -0.2837 |
| C | 4.3663 | 1.2063  | -1.7574 |
| N | 5.8212 | 1.3140  | -1.4265 |
| H | 5.1117 | -1.3156 | 1.7308  |
| H | 3.3967 | -0.8316 | 1.6262  |
| H | 6.9146 | 0.6657  | 0.2374  |
| H | 4.2188 | 0.8208  | -2.7652 |
| C | 3.2595 | -2.5426 | 5.2987  |
| C | 2.5084 | -2.5178 | 4.0068  |
| N | 2.5020 | -3.5676 | 3.0813  |
| C | 1.7190 | -1.5455 | 3.4476  |
| C | 1.7347 | -3.2136 | 2.0052  |
| N | 1.2419 | -1.9806 | 2.1936  |
| H | 4.3344 | -2.6830 | 5.1360  |
| H | 2.9079 | -3.3512 | 5.9505  |
| H | 2.9691 | -4.4609 | 3.2090  |
| H | 1.4589 | -0.5817 | 3.8454  |
| H | 1.5738 | -3.8342 | 1.1430  |
| C | 4.2020 | -5.8016 | -1.8651 |
| C | 3.3064 | -4.6062 | -1.8274 |
| N | 1.9959 | -4.6038 | -2.3195 |
| C | 3.5123 | -3.3339 | -1.3557 |
| C | 1.4492 | -3.3662 | -2.1413 |
| N | 2.3490 | -2.5659 | -1.5505 |
| H | 4.3960 | -6.1192 | -2.8963 |
| H | 3.7650 | -6.6491 | -1.3242 |
| H | 1.5429 | -5.3938 | -2.7701 |
| H | 4.4034 | -2.9215 | -0.9182 |

|    |         |         |         |
|----|---------|---------|---------|
| H  | 0.4516  | -3.0830 | -2.4252 |
| C  | -6.1468 | -3.5975 | -3.4796 |
| C  | -4.9591 | -2.7454 | -3.1917 |
| N  | -3.9599 | -2.4335 | -4.1189 |
| C  | -4.5932 | -2.1026 | -2.0399 |
| C  | -3.0339 | -1.6246 | -3.5204 |
| N  | -3.3927 | -1.4061 | -2.2489 |
| H  | -6.7615 | -3.1702 | -4.2807 |
| H  | -6.7691 | -3.6745 | -2.5849 |
| H  | -3.9463 | -2.7377 | -5.0877 |
| H  | -5.1068 | -2.0825 | -1.0982 |
| H  | -2.1628 | -1.2272 | -4.0091 |
| C  | -7.0791 | 0.0365  | 2.6102  |
| C  | -5.7976 | -0.3474 | 1.9485  |
| N  | -5.1780 | -1.5886 | 2.1277  |
| C  | -4.9959 | 0.3292  | 1.0627  |
| C  | -4.0461 | -1.6344 | 1.3582  |
| N  | -3.9064 | -0.4791 | 0.6959  |
| H  | -7.3530 | 1.0553  | 2.3256  |
| H  | -7.0000 | -0.0031 | 3.7031  |
| H  | -5.5332 | -2.3390 | 2.7125  |
| H  | -5.1323 | 1.3151  | 0.6564  |
| H  | -3.3919 | -2.4855 | 1.2965  |
| C  | -3.2412 | 2.9350  | 3.6242  |
| C  | -2.3524 | 1.7744  | 3.3514  |
| N  | -2.2814 | 0.6518  | 4.1803  |
| C  | -1.5099 | 1.5110  | 2.3021  |
| C  | -1.4210 | -0.2520 | 3.6262  |
| N  | -0.9342 | 0.2425  | 2.4799  |
| H  | -3.0860 | 3.7076  | 2.8669  |
| H  | -3.0434 | 3.3806  | 4.6062  |
| H  | -2.7770 | 0.5414  | 5.0597  |
| H  | -1.2796 | 2.1190  | 1.4430  |
| H  | -1.1719 | -1.2021 | 4.0642  |
| C  | -1.0614 | 7.5499  | -2.2785 |
| C  | -1.1016 | 6.0202  | -2.1196 |
| N  | -0.2042 | 5.5305  | -0.9738 |
| H  | -0.0491 | 7.8999  | -2.5069 |
| H  | -1.4179 | 8.0521  | -1.3729 |
| H  | -2.1068 | 5.6623  | -1.8895 |
| H  | -0.7490 | 5.5138  | -3.0214 |
| H  | -0.2872 | 4.2991  | -0.7971 |
| H  | -0.4849 | 6.0029  | -0.1011 |
| H  | 0.7717  | 5.7980  | -1.1679 |
| C  | 2.0578  | 2.8529  | 1.7409  |
| C  | 2.8390  | 3.0282  | 0.4872  |
| N  | 2.4947  | 2.5205  | -0.6661 |
| C  | 4.1705  | 3.6854  | 0.3456  |
| C  | 3.7002  | 2.6514  | -1.5792 |
| N  | 4.6590  | 3.5216  | -0.8419 |
| H  | 2.1714  | 1.8188  | 2.0924  |
| H  | 0.9937  | 3.0213  | 1.5437  |
| H  | 4.6641  | 4.2529  | 1.1217  |
| H  | 3.4409  | 3.0878  | -2.5427 |
| S  | -0.2658 | -0.3905 | -1.1807 |
| O  | -0.4464 | 3.0085  | -0.5833 |
| Cu | 2.0722  | -0.6691 | -1.0316 |
| Cu | 0.7905  | 1.6267  | -0.9305 |
| Cu | -2.6893 | -0.0930 | -0.9154 |
| Cu | 0.0577  | -0.8065 | 1.0875  |
| H  | -5.8550 | -4.6112 | -3.7788 |
| H  | -7.8980 | -0.6261 | 2.3061  |
| H  | 5.1631  | -5.5607 | -1.4046 |
| H  | 3.1158  | -1.5979 | 5.8284  |
| H  | 4.6190  | 0.2684  | 2.3147  |
| H  | 2.4005  | 3.5299  | 2.5273  |
| H  | -1.7140 | 7.8455  | -3.1056 |
| H  | -4.2966 | 2.6381  | 3.5912  |
| N  | -2.7009 | 1.8583  | -1.0186 |
| N  | -2.2291 | 2.9003  | -0.9805 |

## 4

SCF done: -3346.570944

|   |         |         |         |
|---|---------|---------|---------|
| C | -1.7347 | 0.3423  | 4.4565  |
| C | -2.9633 | 0.7124  | 3.7166  |
| N | -2.9944 | 1.0237  | 2.4497  |
| C | -4.3569 | 0.6870  | 4.2188  |
| C | -4.4217 | 0.9763  | 2.0551  |
| N | -5.2046 | 0.8765  | 3.2674  |
| H | -1.5786 | 0.9917  | 5.3293  |
| H | -0.8508 | 0.3764  | 3.8157  |
| H | -4.6606 | 0.5410  | 5.2553  |
| H | -4.7092 | 1.8596  | 1.4749  |
| C | 2.3023  | -0.3707 | 6.1715  |
| C | 2.0749  | 0.2207  | 4.8272  |
| N | 2.2167  | 1.5698  | 4.5426  |
| C | 1.6724  | -0.3383 | 3.6368  |
| C | 1.9058  | 1.7891  | 3.2402  |
| N | 1.5662  | 0.6416  | 2.6577  |
| H | 1.5850  | 0.0093  | 6.9104  |
| H | 3.3120  | -0.1541 | 6.5442  |
| H | 2.5482  | 2.2760  | 5.1949  |
| H | 1.4562  | -1.3777 | 3.4248  |
| H | 1.9404  | 2.7612  | 2.7670  |
| C | -0.7437 | 6.5453  | 3.7795  |
| C | -0.8717 | 5.4587  | 2.7820  |
| N | -0.6532 | 5.6397  | 1.4268  |
| C | -1.2017 | 4.1298  | 2.9048  |
| C | -0.8456 | 4.4670  | 0.7804  |
| N | -1.1801 | 3.5231  | 1.6590  |
| H | -1.4194 | 7.3803  | 3.5541  |
| H | 0.2777  | 6.9456  | 3.8208  |
| H | -0.4183 | 6.5243  | 0.9836  |
| H | -1.4702 | 3.5908  | 3.8038  |
| H | -0.7378 | 4.3338  | -0.2872 |
| C | 3.2933  | 4.2143  | -5.8555 |
| C | 2.3752  | 3.5065  | -4.9310 |
| N | 0.9974  | 3.6503  | -4.9414 |
| C | 2.6167  | 2.5975  | -3.9291 |
| C | 0.4582  | 2.8550  | -3.9847 |
| N | 1.4249  | 2.1995  | -3.3468 |
| H | 3.1024  | 3.9436  | -6.9022 |
| H | 4.3304  | 3.9533  | -5.6270 |
| H | 0.4717  | 4.2416  | -5.5800 |
| H | 3.5704  | 2.2036  | -3.6048 |
| H | -0.6042 | 2.7672  | -3.7976 |
| C | 5.4943  | -2.3747 | -4.1515 |
| C | 4.7100  | -1.4497 | -3.2943 |
| N | 5.2797  | -0.5676 | -2.3901 |
| C | 3.3588  | -1.2236 | -3.1885 |
| C | 4.2973  | 0.1467  | -1.7845 |
| N | 3.1080  | -0.2325 | -2.2505 |
| H | 4.8207  | -2.9626 | -4.7816 |
| H | 6.0998  | -3.0723 | -3.5583 |
| H | 6.2768  | -0.4565 | -2.2261 |
| H | 2.5617  | -1.7106 | -3.7335 |
| H | 4.4814  | 0.9114  | -1.0415 |
| C | 2.2353  | -4.7237 | -1.3195 |
| C | 2.2232  | -3.5131 | -0.4736 |
| N | 3.2736  | -3.1470 | 0.3517  |
| C | 1.2909  | -2.5166 | -0.3310 |
| C | 2.9707  | -1.9746 | 0.9570  |
| N | 1.7672  | -1.5663 | 0.5600  |
| H | 1.2829  | -4.8182 | -1.8486 |
| H | 2.3781  | -5.6405 | -0.7321 |
| H | 4.1197  | -3.6886 | 0.5059  |
| H | 0.3214  | -2.4110 | -0.8134 |
| H | 3.6253  | -1.4634 | 1.6508  |
| C | -5.0577 | -4.6587 | -4.0945 |
| C | -4.1406 | -3.5209 | -3.6451 |
| N | -3.9172 | -3.4509 | -2.1801 |
| H | -6.0592 | -4.5666 | -3.6559 |

|    |         |         |         |
|----|---------|---------|---------|
| H  | -4.6471 | -5.6367 | -3.8103 |
| H  | -3.1562 | -3.6161 | -4.1206 |
| H  | -4.5497 | -2.5524 | -3.9606 |
| H  | -2.5820 | -2.1897 | -1.6700 |
| H  | -3.5581 | -4.3542 | -1.8575 |
| H  | -4.8200 | -3.3323 | -1.7111 |
| C  | -2.0027 | -2.7887 | 1.8315  |
| C  | -3.2621 | -2.0485 | 1.5966  |
| N  | -3.3404 | -0.9676 | 0.8708  |
| C  | -4.5861 | -2.2793 | 2.2099  |
| C  | -4.6555 | -0.3580 | 1.1655  |
| N  | -5.4055 | -1.3218 | 1.9401  |
| H  | -2.1317 | -3.5780 | 2.5788  |
| H  | -1.2225 | -2.0932 | 2.1646  |
| H  | -4.8739 | -3.1458 | 2.8052  |
| H  | -5.1960 | -0.0936 | 0.2501  |
| S  | -0.4010 | 1.2284  | -0.6181 |
| O  | -1.7373 | -1.6739 | -1.5084 |
| Cu | -1.5936 | 1.6393  | 1.2127  |
| Cu | -1.9101 | -0.3240 | -0.2641 |
| Cu | 1.3311  | 0.6680  | -2.0364 |
| Cu | 0.9526  | 0.2268  | 0.7846  |
| H  | 3.1969  | 5.3045  | -5.7699 |
| H  | 6.1731  | -1.8264 | -4.8171 |
| H  | -1.0014 | 6.1773  | 4.7768  |
| H  | 2.1940  | -1.4581 | 6.1256  |
| H  | -1.8512 | -0.6725 | 4.8615  |
| H  | -1.6406 | -3.2422 | 0.8992  |
| H  | -5.1675 | -4.6472 | -5.1857 |
| H  | 3.0347  | -4.6853 | -2.0728 |
| N  | 0.1226  | -0.6670 | -3.4201 |
| N  | -0.2279 | -0.9840 | -4.4224 |

## 5

SCF done: -3237.049124

|   |         |         |         |
|---|---------|---------|---------|
| C | -1.8282 | 0.3147  | 4.4122  |
| C | -3.0095 | 0.6359  | 3.5754  |
| N | -2.9736 | 1.1849  | 2.3460  |
| C | -4.4123 | 0.5482  | 3.9500  |
| C | -4.3109 | 1.3843  | 2.0043  |
| N | -5.1802 | 1.0387  | 2.9919  |
| H | -1.7195 | 1.0715  | 5.2047  |
| H | -0.9048 | 0.2901  | 3.8275  |
| H | -4.8171 | 0.1730  | 4.8871  |
| H | -4.5962 | 2.0121  | 1.1670  |
| C | 2.2088  | -0.3983 | 6.1272  |
| C | 2.0046  | 0.2075  | 4.7906  |
| N | 2.1346  | 1.5609  | 4.5226  |
| C | 1.6416  | -0.3474 | 3.5877  |
| C | 1.8538  | 1.7881  | 3.2156  |
| N | 1.5471  | 0.6391  | 2.6166  |
| H | 1.4755  | -0.0329 | 6.8574  |
| H | 3.2090  | -0.1792 | 6.5236  |
| H | 2.4347  | 2.2666  | 5.1905  |
| H | 1.4394  | -1.3867 | 3.3637  |
| H | 1.8825  | 2.7642  | 2.7509  |
| C | -0.8372 | 6.5177  | 3.7352  |
| C | -0.8539 | 5.4401  | 2.7232  |
| N | -0.4585 | 5.6218  | 1.4079  |
| C | -1.2332 | 4.1224  | 2.7943  |
| C | -0.6006 | 4.4577  | 0.7333  |
| N | -1.0693 | 3.5220  | 1.5576  |
| H | -1.5308 | 7.3265  | 3.4719  |
| H | 0.1616  | 6.9588  | 3.8452  |
| H | -0.1542 | 6.5040  | 1.0036  |
| H | -1.6359 | 3.5881  | 3.6445  |
| H | -0.3710 | 4.3257  | -0.3153 |
| C | 3.1998  | 4.1867  | -5.8998 |
| C | 2.3532  | 3.3933  | -4.9796 |
| N | 0.9686  | 3.3563  | -5.0270 |
| C | 2.6828  | 2.5685  | -3.9314 |

|                       |              |         |         |   |         |         |         |
|-----------------------|--------------|---------|---------|---|---------|---------|---------|
| C                     | 0.5065       | 2.5465  | -4.0443 | N | -5.1472 | 0.7232  | 2.9859  |
| N                     | 1.5342       | 2.0536  | -3.3551 | H | -1.7472 | 1.1319  | 5.3462  |
| H                     | 3.0623       | 3.8811  | -6.9451 | H | -0.8636 | 0.4291  | 3.9746  |
| H                     | 4.2549       | 4.0497  | -5.6477 | H | -4.7587 | -0.2389 | 4.8420  |
| H                     | 0.3888       | 3.8432  | -5.7061 | H | -4.6216 | 1.8326  | 1.2336  |
| H                     | 3.6701       | 2.3146  | -3.5691 | C | 2.2458  | -0.3429 | 6.2648  |
| H                     | -0.5402      | 2.3345  | -3.8714 | C | 2.0075  | 0.2604  | 4.9377  |
| C                     | 5.4008       | -2.4023 | -4.1958 | N | 2.1668  | 1.6032  | 4.6423  |
| C                     | 4.7422       | -1.4387 | -3.2741 | C | 1.5882  | -0.3069 | 3.7606  |
| N                     | 5.4370       | -0.6340 | -2.3853 | C | 1.8543  | 1.8117  | 3.3388  |
| C                     | 3.4215       | -1.1017 | -3.0829 | N | 1.4989  | 0.6600  | 2.7741  |
| C                     | 4.5610       | 0.1436  | -1.7025 | H | 1.5470  | 0.0419  | 7.0204  |
| N                     | 3.3183       | -0.1234 | -2.1042 | H | 3.2635  | -0.1471 | 6.6274  |
| H                     | 4.6490       | -2.9233 | -4.7955 | H | 2.4991  | 2.3138  | 5.2893  |
| H                     | 5.9812       | -3.1569 | -3.6495 | H | 1.3174  | -1.3388 | 3.5801  |
| H                     | 6.4482       | -0.6069 | -2.2826 | H | 1.9017  | 2.7764  | 2.8524  |
| H                     | 2.5492       | -1.4969 | -3.5872 | C | -0.8002 | 6.5731  | 3.8728  |
| H                     | 4.8558       | 0.8662  | -0.9535 | C | -0.8462 | 5.5262  | 2.8293  |
| C                     | 2.1418       | -4.7513 | -1.3638 | N | -0.4473 | 5.7280  | 1.5177  |
| C                     | 2.1902       | -3.5472 | -0.5135 | C | -1.2508 | 4.2157  | 2.8739  |
| N                     | 3.2284       | -3.2546 | 0.3553  | C | -0.6048 | 4.5774  | 0.8213  |
| C                     | 1.3213       | -2.4911 | -0.4047 | N | -1.0898 | 3.6358  | 1.6274  |
| C                     | 2.9794       | -2.0666 | 0.9557  | H | -1.4708 | 7.4094  | 3.6334  |
| N                     | 1.8235       | -1.5788 | 0.5104  | H | 0.2096  | 6.9842  | 3.9964  |
| H                     | 1.1890       | -4.7942 | -1.8982 | H | -0.1260 | 6.6117  | 1.1307  |
| H                     | 2.2376       | -5.6765 | -0.7804 | H | -1.6712 | 3.6710  | 3.7090  |
| H                     | 4.0294       | -3.8518 | 0.5425  | H | -0.3641 | 4.4569  | -0.2264 |
| H                     | 0.3777       | -2.3305 | -0.9233 | C | 3.2368  | 4.2421  | -5.7622 |
| H                     | 3.6378       | -1.6036 | 1.6789  | C | 2.3553  | 3.6775  | -4.7262 |
| C                     | -5.1512      | -4.6863 | -4.1388 | N | 0.9850  | 3.8671  | -4.6717 |
| C                     | -4.1667      | -3.5506 | -3.8309 | C | 2.6359  | 2.8449  | -3.6748 |
| N                     | -3.8579      | -3.3971 | -2.3935 | C | 0.4820  | 3.1631  | -3.6316 |
| H                     | -6.1131      | -4.5240 | -3.6364 | N | 1.4727  | 2.5292  | -2.9987 |
| H                     | -4.7529      | -5.6572 | -3.8187 | H | 2.9445  | 3.9109  | -6.7676 |
| H                     | -3.2176      | -3.7168 | -4.3562 | H | 4.2691  | 3.9198  | -5.5963 |
| H                     | -4.5670      | -2.5929 | -4.1854 | H | 0.4418  | 4.4348  | -5.3173 |
| H                     | -2.4305      | -2.1212 | -1.9192 | H | 3.5983  | 2.4515  | -3.3805 |
| H                     | -3.4966      | -4.2778 | -2.0177 | H | -0.5697 | 3.1137  | -3.3803 |
| H                     | -4.7126      | -3.1851 | -1.8705 | C | 5.4378  | -2.3469 | -4.0582 |
| C                     | -2.0962      | -2.8163 | 1.7872  | C | 4.6196  | -1.3639 | -3.3083 |
| C                     | -3.3029      | -2.0323 | 1.4518  | N | 5.1435  | -0.4804 | -2.3791 |
| N                     | -3.3296      | -1.0478 | 0.5380  | C | 3.2717  | -1.0923 | -3.3315 |
| C                     | -4.6594      | -2.1648 | 1.9466  | C | 4.1439  | 0.2902  | -1.8833 |
| C                     | -4.6430      | -0.5831 | 0.5280  | N | 2.9942  | -0.0642 | -2.4524 |
| N                     | -5.4606      | -1.2952 | 1.3456  | H | 4.8014  | -2.9264 | -4.7322 |
| H                     | -2.2613      | -3.4372 | 2.6735  | H | 5.9501  | -3.0486 | -3.3865 |
| H                     | -1.2299      | -2.1637 | 1.9597  | H | 6.1246  | -0.4082 | -2.1225 |
| H                     | -5.0219      | -2.8869 | 2.6741  | H | 2.4779  | -1.5518 | -3.9053 |
| H                     | -5.0099      | 0.0828  | -0.2458 | H | 4.2846  | 1.0581  | -1.1341 |
| S                     | -0.3185      | 1.2209  | -0.6757 | C | 2.1788  | -4.6959 | -1.2262 |
| O                     | -1.5918      | -1.6016 | -1.7491 | C | 2.1786  | -3.5285 | -0.3152 |
| Cu                    | -1.5253      | 1.6467  | 1.1171  | N | 3.0318  | -3.3539 | 0.7635  |
| Cu                    | -1.8238      | -0.3440 | -0.4225 | C | 1.4239  | -2.3843 | -0.3535 |
| Cu                    | 1.6235       | 0.8419  | -1.7821 | C | 2.7908  | -2.1424 | 1.3238  |
| Cu                    | 1.0393       | 0.2167  | 0.7381  | N | 1.8153  | -1.5245 | 0.6561  |
| H                     | 2.9758       | 5.2595  | -5.8333 | H | 1.4071  | -4.5666 | -1.9894 |
| H                     | 6.0835       | -1.8919 | -4.8871 | H | 1.9797  | -5.6386 | -0.6981 |
| H                     | -1.1442      | 6.1274  | 4.7095  | H | 3.7266  | -4.0202 | 1.0904  |
| H                     | 2.1084       | -1.4856 | 6.0660  | H | 0.7265  | -2.0661 | -1.1234 |
| H                     | -1.9614      | -0.6452 | 4.9270  | C | 3.3342  | -1.7536 | 2.1749  |
| H                     | -1.8275      | -3.4812 | 0.9532  | H | -5.1142 | -4.6309 | -4.0012 |
| H                     | -5.3363      | -4.7359 | -5.2187 | C | -4.3593 | -3.3956 | -3.5873 |
| H                     | 2.9456       | -4.7526 | -2.1139 | N | -4.2794 | -3.2931 | -2.0822 |
|                       |              |         |         | H | -6.1527 | -4.6181 | -3.6502 |
|                       |              |         |         | H | -4.6267 | -5.5487 | -3.6495 |
|                       |              |         |         | H | -3.3240 | -3.4077 | -3.9438 |
|                       |              |         |         | H | -4.8313 | -2.4727 | -3.9373 |
|                       |              |         |         | H | -3.6442 | -2.5255 | -1.8053 |
|                       |              |         |         | H | -3.9219 | -4.1660 | -1.6734 |
|                       |              |         |         | H | -5.1839 | -3.0980 | -1.6094 |
|                       |              |         |         | C | -2.0592 | -2.7609 | 1.9248  |
| <b>TS<sub>6</sub></b> |              |         |         |   |         |         |         |
| SCF done:             | -3346.513971 |         |         |   |         |         |         |
| C                     | -1.7912      | 0.3701  | 4.5498  |   |         |         |         |
| C                     | -2.9819      | 0.5947  | 3.6962  |   |         |         |         |
| N                     | -2.9693      | 1.2566  | 2.5135  |   |         |         |         |
| C                     | -4.3588      | 0.2669  | 3.9674  |   |         |         |         |
| C                     | -4.2984      | 1.3108  | 2.1283  |   |         |         |         |

|    |         |         |         |
|----|---------|---------|---------|
| C  | -3.2931 | -2.2740 | 1.2498  |
| N  | -3.3395 | -1.1458 | 0.4749  |
| C  | -4.5907 | -2.8350 | 1.2118  |
| C  | -4.6386 | -1.0590 | 0.0342  |
| N  | -5.4111 | -2.0793 | 0.4322  |
| H  | -2.3144 | -3.4631 | 2.7256  |
| H  | -1.4975 | -1.9261 | 2.3627  |
| H  | -4.9485 | -3.7264 | 1.7188  |
| H  | -4.9878 | -0.2509 | -0.6018 |
| S  | -0.3156 | 1.3051  | -0.5665 |
| Cu | -1.5470 | 1.7546  | 1.2555  |
| Cu | -1.8923 | -0.1634 | -0.3154 |
| Cu | 1.1743  | 0.7017  | -2.2556 |
| Cu | 0.9246  | 0.2553  | 0.9176  |
| H  | 3.2309  | 5.3409  | -5.7599 |
| H  | 6.2060  | -1.8516 | -4.6669 |
| H  | -1.1229 | 6.1626  | 4.8337  |
| H  | 2.1124  | -1.4270 | 6.2130  |
| H  | -1.8502 | -0.5996 | 5.0585  |
| H  | -1.3830 | -3.2844 | 1.2323  |
| H  | -5.1448 | -4.6854 | -5.0954 |
| H  | 3.1430  | -4.8099 | -1.7396 |
| N  | -1.3960 | -1.3234 | -3.0063 |
| N  | -2.1363 | -1.0787 | -2.1742 |
| O  | 0.4139  | -0.8538 | -2.6692 |

### 7

SCF done: -3346.576235

|   |         |         |         |
|---|---------|---------|---------|
| C | -1.5239 | 0.5741  | 4.6508  |
| C | -2.7058 | 0.6159  | 3.7539  |
| N | -2.7001 | 1.0620  | 2.4691  |
| C | -4.0470 | 0.1904  | 4.0288  |
| C | -3.9996 | 0.8903  | 2.0311  |
| N | -4.8252 | 0.3647  | 2.9468  |
| H | -1.7236 | 1.1227  | 5.5830  |
| H | -0.6374 | 1.0003  | 4.1715  |
| H | -4.4328 | -0.2170 | 4.9595  |
| H | -4.3085 | 1.1659  | 1.0279  |
| C | 2.5131  | -0.1389 | 6.3658  |
| C | 2.4511  | 0.4581  | 5.0176  |
| N | 2.9134  | 1.7217  | 4.6923  |
| C | 1.9314  | -0.0336 | 3.8478  |
| C | 2.6668  | 1.9615  | 3.3796  |
| N | 2.0654  | 0.9049  | 2.8392  |
| H | 1.9576  | 0.4578  | 7.1019  |
| H | 3.5451  | -0.2286 | 6.7295  |
| H | 3.3844  | 2.3603  | 5.3282  |
| H | 1.4530  | -0.9900 | 3.6798  |
| H | 2.9266  | 2.8819  | 2.8735  |
| C | -0.5329 | 6.7771  | 3.9738  |
| C | -0.7532 | 5.6923  | 2.9761  |
| N | -0.8691 | 5.9308  | 1.6167  |
| C | -0.8938 | 4.3276  | 3.0990  |
| C | -1.0634 | 4.7579  | 0.9695  |
| N | -1.0822 | 3.7579  | 1.8486  |
| H | -1.3484 | 7.5121  | 3.9562  |
| H | 0.4083  | 7.3108  | 3.7883  |
| H | -0.8455 | 6.8478  | 1.1789  |
| H | -0.8940 | 3.7351  | 4.0043  |
| H | -1.1807 | 4.6669  | -0.1019 |
| C | 3.5041  | 4.4461  | -5.6612 |
| C | 2.4499  | 3.5308  | -5.1630 |
| N | 1.1445  | 3.5081  | -5.6288 |
| C | 2.4910  | 2.5513  | -4.2052 |
| C | 0.4498  | 2.5508  | -4.9694 |
| N | 1.2501  | 1.9484  | -4.0916 |
| H | 3.6863  | 4.3080  | -6.7346 |
| H | 4.4443  | 4.2542  | -5.1366 |
| H | 0.7697  | 4.1001  | -6.3657 |
| H | 3.3360  | 2.2382  | -3.6105 |
| H | -0.5930 | 2.3244  | -5.1480 |

|    |         |         |         |
|----|---------|---------|---------|
| C  | 5.7051  | -2.1429 | -3.9572 |
| C  | 4.6276  | -1.3129 | -3.3570 |
| N  | 4.8365  | -0.4716 | -2.2757 |
| C  | 3.2951  | -1.1538 | -3.6663 |
| C  | 3.6748  | 0.1562  | -1.9663 |
| N  | 2.7178  | -0.2454 | -2.7962 |
| H  | 5.3080  | -2.7211 | -4.7963 |
| H  | 6.1269  | -2.8497 | -3.2312 |
| H  | 5.7277  | -0.3256 | -1.8105 |
| H  | 2.7304  | -1.6300 | -4.4578 |
| H  | 3.5639  | 0.8679  | -1.1589 |
| C  | 2.4461  | -4.4919 | -1.1252 |
| C  | 2.4661  | -3.2903 | -0.2609 |
| N  | 3.3861  | -3.0765 | 0.7548  |
| C  | 1.6747  | -2.1693 | -0.2593 |
| C  | 3.1384  | -1.8748 | 1.3291  |
| N  | 2.0986  | -1.2963 | 0.7288  |
| H  | 1.6473  | -4.4022 | -1.8667 |
| H  | 2.2715  | -5.4122 | -0.5515 |
| H  | 4.1099  | -3.7278 | 1.0466  |
| H  | 0.8537  | -1.9249 | -0.9246 |
| H  | 3.7062  | -1.4693 | 2.1565  |
| C  | -4.8469 | -4.4269 | -3.9002 |
| C  | -5.6254 | -5.1937 | -2.8485 |
| N  | -6.2196 | -4.2464 | -1.8398 |
| H  | -4.0074 | -3.8768 | -3.4611 |
| H  | -5.4912 | -3.7269 | -4.4483 |
| H  | -6.4389 | -5.7801 | -3.2893 |
| H  | -4.9772 | -5.8757 | -2.2884 |
| H  | -6.6993 | -4.7554 | -1.0883 |
| H  | -6.9213 | -3.6388 | -2.2798 |
| H  | -5.4052 | -3.5923 | -1.3867 |
| C  | -1.7919 | -2.5569 | 2.0258  |
| C  | -2.6653 | -2.4286 | 0.8361  |
| N  | -2.4839 | -1.5240 | -0.1891 |
| C  | -3.7579 | -3.2272 | 0.4875  |
| C  | -3.4416 | -1.8160 | -1.1054 |
| N  | -4.2359 | -2.8371 | -0.7290 |
| H  | -2.3028 | -3.1017 | 2.8265  |
| H  | -1.4991 | -1.5695 | 2.4064  |
| H  | -4.2012 | -4.0379 | 1.0567  |
| H  | -3.5467 | -1.2786 | -2.0405 |
| S  | 0.1007  | 1.6424  | -0.3185 |
| Cu | -1.3119 | 1.8138  | 1.3458  |
| Cu | -1.1655 | -0.0959 | -0.5043 |
| Cu | 0.8200  | 0.4377  | -2.9025 |
| Cu | 1.3403  | 0.5210  | 1.0464  |
| H  | 3.2403  | 5.4995  | -5.5004 |
| H  | 6.5249  | -1.5226 | -4.3418 |
| H  | -0.4889 | 6.3559  | 4.9821  |
| H  | 2.0788  | -1.1425 | 6.3525  |
| H  | -1.2944 | -0.4594 | 4.9491  |
| H  | -0.8672 | -3.1034 | 1.7833  |
| H  | -4.4442 | -5.1327 | -4.6347 |
| H  | 3.3933  | -4.6174 | -1.6666 |
| N  | -2.3451 | 1.7082  | -2.5403 |
| N  | -2.5833 | 1.1500  | -1.6150 |
| O  | -0.5249 | -0.5227 | -2.2147 |

### 8

SCF done: -3237.054468

|   |         |         |        |
|---|---------|---------|--------|
| C | -1.6091 | 0.5938  | 4.6197 |
| C | -2.7937 | 0.6469  | 3.7287 |
| N | -2.7943 | 1.1184  | 2.4537 |
| C | -4.1345 | 0.2181  | 4.0025 |
| C | -4.0967 | 0.9577  | 2.0191 |
| N | -4.9178 | 0.4159  | 2.9283 |
| H | -1.8019 | 1.1371  | 5.5566 |
| H | -0.7230 | 1.0200  | 4.1396 |
| H | -4.5157 | -0.2070 | 4.9271 |
| H | -4.4130 | 1.2569  | 1.0255 |

|   |         |         |         |           |              |         |         |
|---|---------|---------|---------|-----------|--------------|---------|---------|
| C | 2.4279  | -0.1192 | 6.3347  | H         | -2.3948      | -3.0731 | 2.7968  |
| C | 2.3618  | 0.4789  | 4.9871  | H         | -1.5830      | -1.5475 | 2.3676  |
| N | 2.8265  | 1.7415  | 4.6615  | H         | -4.2475      | -4.0582 | 1.0076  |
| C | 1.8360  | -0.0100 | 3.8189  | H         | -3.6662      | -1.2492 | -2.0599 |
| C | 2.5729  | 1.9845  | 3.3508  | S         | 0.0103       | 1.6537  | -0.3456 |
| N | 1.9665  | 0.9302  | 2.8115  | Cu        | -1.4015      | 1.8479  | 1.3154  |
| H | 1.8591  | 0.4670  | 7.0689  | Cu        | -1.2538      | -0.0885 | -0.5282 |
| H | 3.4593  | -0.1935 | 6.7032  | Cu        | 0.7394       | 0.4659  | -2.9271 |
| H | 3.2975  | 2.3798  | 5.2978  | Cu        | 1.2666       | 0.5393  | 1.0092  |
| H | 1.3561  | -0.9656 | 3.6508  | H         | 3.1468       | 5.5192  | -5.5472 |
| H | 2.8332  | 2.9048  | 2.8448  | H         | 6.4581       | -1.5088 | -4.3407 |
| C | -0.6181 | 6.7968  | 3.9427  | H         | -0.6296      | 6.3795  | 4.9537  |
| C | -0.8238 | 5.7133  | 2.9425  | H         | 2.0087       | -1.1293 | 6.3175  |
| N | -0.8819 | 5.9476  | 1.5787  | H         | -1.3822      | -0.4422 | 4.9115  |
| C | -0.9955 | 4.3521  | 3.0656  | H         | -0.9534      | -3.0900 | 1.7623  |
| C | -1.0709 | 4.7757  | 0.9289  | H         | -4.5361      | -5.0813 | -4.6990 |
| N | -1.1444 | 3.7808  | 1.8111  | H         | 3.3136       | -4.6098 | -1.6851 |
| H | -1.4130 | 7.5520  | 3.8872  | O         | -0.5582      | -0.5431 | -2.2117 |
| H | 0.3427  | 7.3068  | 3.7969  |           |              |         |         |
| H | -0.8202 | 6.8613  | 1.1380  |           |              |         |         |
| H | -1.0471 | 3.7639  | 3.9722  | <b>9</b>  |              |         |         |
| H | -1.1527 | 4.6836  | -0.1456 | SCF done: | -2937.987202 |         |         |
| C | 3.4189  | 4.4658  | -5.6923 | C         | -4.2656      | -0.8313 | -0.5660 |
| C | 2.3650  | 3.5504  | -5.1922 | N         | -3.6648      | 0.2483  | -0.9899 |
| N | 1.0584  | 3.5310  | -5.6551 | C         | -5.7342      | -0.6975 | -0.8201 |
| C | 2.4075  | 2.5672  | -4.2387 | C         | -4.6975      | 1.0499  | -1.7395 |
| C | 0.3640  | 2.5728  | -4.9970 | N         | -6.0174      | 0.3978  | -1.4533 |
| N | 1.1650  | 1.9661  | -4.1227 | H         | -6.4835      | -1.4115 | -0.5100 |
| H | 3.6129  | 4.3148  | -6.7620 | H         | -4.6222      | 1.9987  | -2.2684 |
| H | 4.3550  | 4.2867  | -5.1558 | C         | -2.5578      | -1.4697 | 4.2367  |
| H | 0.6825  | 4.1288  | -6.3869 | N         | -2.4276      | -0.1022 | 4.4969  |
| H | 3.2540  | 2.2503  | -3.6483 | C         | -1.8263      | -1.6888 | 3.0993  |
| H | -0.6783 | 2.3454  | -5.1770 | C         | -1.6405      | 0.4610  | 3.5236  |
| C | 5.6199  | -2.1232 | -3.9883 | N         | -1.2557      | -0.4812 | 2.6555  |
| C | 4.5453  | -1.2884 | -3.3886 | H         | -2.8359      | 0.3865  | 5.2872  |
| N | 4.7546  | -0.4579 | -2.2990 | H         | -1.6810      | -2.6098 | 2.5659  |
| C | 3.2149  | -1.1179 | -3.7024 | H         | -1.3973      | 1.5059  | 3.4680  |
| C | 3.5959  | 0.1753  | -1.9893 | C         | -3.1740      | 4.3108  | 2.0206  |
| N | 2.6404  | -0.2120 | -2.8276 | N         | -1.8497      | 4.6353  | 1.7064  |
| H | 5.2295  | -2.6741 | -4.8486 | C         | -3.4077      | 3.1109  | 1.4023  |
| H | 6.0143  | -2.8536 | -3.2700 | C         | -1.3250      | 3.6441  | 0.9211  |
| H | 5.6458  | -0.3176 | -1.8322 | N         | -2.2522      | 2.7009  | 0.7241  |
| H | 2.6508  | -1.5825 | -4.5014 | H         | -1.3731      | 5.4860  | 1.9872  |
| H | 3.4865  | 0.8811  | -1.1766 | H         | -4.3159      | 2.5356  | 1.3855  |
| C | 2.3609  | -4.4722 | -1.1563 | H         | -0.3254      | 3.6221  | 0.5226  |
| C | 2.3844  | -3.2724 | -0.2901 | C         | 5.2683       | 3.8163  | -0.5438 |
| N | 3.2963  | -3.0671 | 0.7348  | N         | 4.6442       | 4.1768  | -1.7415 |
| C | 1.6024  | -2.1453 | -0.2963 | C         | 4.7433       | 2.5952  | -0.2185 |
| C | 3.0540  | -1.8628 | 1.3061  | C         | 3.7704       | 3.1809  | -2.0982 |
| N | 2.0261  | -1.2749 | 0.6944  | N         | 3.8086       | 2.2044  | -1.1882 |
| H | 1.5740  | -4.3702 | -1.9088 | H         | 4.8268       | 5.0242  | -2.2683 |
| H | 2.1644  | -5.3911 | -0.5871 | H         | 4.9721       | 1.9747  | 0.6273  |
| H | 4.0109  | -3.7251 | 1.0340  | H         | 3.1543       | 3.2048  | -2.9788 |
| H | 0.7902  | -1.8920 | -0.9695 | C         | 5.7256       | -1.6215 | 1.2085  |
| H | 3.6166  | -1.4624 | 2.1396  | N         | 4.9343       | -1.1668 | 2.2690  |
| C | -4.9321 | -4.4072 | -3.9313 | C         | 5.0710       | -1.2174 | 0.0714  |
| C | -5.6411 | -5.2213 | -2.8672 | C         | 3.8445       | -0.5107 | 1.7546  |
| N | -6.2641 | -4.3104 | -1.8431 | N         | 3.8987       | -0.5259 | 0.4201  |
| H | -4.0936 | -3.8399 | -3.5131 | H         | 5.1526       | -1.2832 | 3.2525  |
| H | -5.6200 | -3.7163 | -4.4352 | H         | 5.3555       | -1.3646 | -0.9549 |
| H | -6.4289 | -5.8533 | -3.2908 | H         | 3.0648       | -0.0722 | 2.3500  |
| H | -4.9439 | -5.8674 | -2.3236 | C         | 2.2155       | -3.9692 | 0.5773  |
| H | -6.7027 | -4.8440 | -1.0886 | N         | 1.8431       | -4.1091 | 1.9165  |
| H | -7.0045 | -3.7387 | -2.2674 | C         | 1.6268       | -2.8079 | 0.1543  |
| H | -5.4700 | -3.6185 | -1.4023 | C         | 1.0540       | -3.0439 | 2.2628  |
| C | -1.8771 | -2.5372 | 1.9947  | N         | 0.9005       | -2.2353 | 1.2063  |
| C | -2.7466 | -2.4171 | 0.7993  | H         | 2.1109       | -4.8769 | 2.5234  |
| N | -2.5917 | -1.4929 | -0.2140 | H         | 1.7325       | -2.3183 | -0.7949 |
| C | -3.8250 | -3.2304 | 0.4475  | H         | 0.6298       | -2.8975 | 3.2394  |
| C | -3.5493 | -1.7921 | -1.1290 | C         | -2.4777      | -2.6881 | -2.7189 |
| N | -4.3189 | -2.8338 | -0.7614 | N         | -2.2071      | -1.4478 | -3.0147 |
|   |         |         |         | C         | -3.6827      | -3.1217 | -3.4839 |

|    |         |         |         |
|----|---------|---------|---------|
| C  | -3.3741 | -0.9444 | -3.8404 |
| N  | -4.1939 | -2.1479 | -4.1642 |
| H  | -4.0766 | -4.1282 | -3.4944 |
| H  | -3.5801 | 0.0315  | -4.2764 |
| S  | 0.3891  | 0.9389  | -0.8067 |
| Cu | -1.9734 | 1.0516  | -0.3523 |
| Cu | -0.7745 | -0.3614 | -2.2371 |
| Cu | 2.7239  | 0.5050  | -0.8855 |
| Cu | -0.0624 | -0.4346 | 1.0356  |
| N  | 1.8644  | -1.0067 | -3.3870 |
| N  | 0.7255  | -0.9740 | -3.6396 |
| O  | 2.8477  | -0.7894 | -2.5800 |
| H  | 2.8541  | -4.6504 | 0.0549  |
| H  | 6.6441  | -2.1531 | 1.3455  |
| H  | -1.9956 | -3.2728 | -1.9635 |
| H  | -3.7419 | -1.6687 | -0.1545 |
| H  | -3.1266 | -2.1515 | 4.8337  |
| H  | 5.9944  | 4.4115  | -0.0305 |
| H  | -3.8182 | 4.9192  | 2.6204  |

**TS<sub>10</sub>**

SCF done: -2937.943695

|   |         |         |         |
|---|---------|---------|---------|
| C | -4.2084 | -0.6585 | 0.4199  |
| N | -3.5541 | -0.1124 | -0.5715 |
| C | -5.4823 | -1.2428 | -0.0678 |
| C | -4.2602 | -0.6358 | -1.8236 |
| N | -5.5664 | -1.1709 | -1.3618 |
| H | -6.2649 | -1.6491 | 0.5553  |
| H | -4.3565 | 0.1055  | -2.6113 |
| C | -1.9765 | 1.2809  | 4.8526  |
| N | -1.7026 | 2.5346  | 4.3095  |
| C | -1.6248 | 0.3696  | 3.8954  |
| C | -1.1944 | 2.3582  | 3.0514  |
| N | -1.1255 | 1.0500  | 2.7685  |
| H | -1.8564 | 3.4239  | 4.7735  |
| H | -1.6812 | -0.7029 | 3.9261  |
| H | -0.9127 | 3.1581  | 2.3925  |
| C | -2.4549 | 5.2848  | 0.0977  |
| N | -1.2318 | 5.1797  | -0.5649 |
| C | -2.9440 | 4.0094  | 0.1938  |
| C | -1.0025 | 3.8665  | -0.8502 |
| N | -2.0245 | 3.1232  | -0.3979 |
| H | -0.6318 | 5.9578  | -0.8179 |
| H | -3.8693 | 3.6678  | 0.6209  |
| H | -0.1263 | 3.4776  | -1.3370 |
| C | 5.3615  | 2.4417  | -2.5552 |
| N | 4.3506  | 2.5406  | -3.5110 |
| C | 4.8984  | 1.5795  | -1.6023 |
| C | 3.3092  | 1.7468  | -3.1206 |
| N | 3.6125  | 1.1498  | -1.9614 |
| H | 4.3966  | 3.0876  | -4.3640 |
| H | 5.3825  | 1.2311  | -0.7107 |
| H | 2.3934  | 1.6259  | -3.6700 |
| C | 5.7615  | -1.5570 | 1.5046  |
| N | 5.2232  | -0.5046 | 2.2464  |
| C | 4.9662  | -1.6849 | 0.3957  |
| C | 4.1310  | -0.0221 | 1.5793  |
| N | 3.9499  | -0.7175 | 0.4503  |
| H | 5.5946  | -0.1523 | 3.1218  |
| H | 5.0369  | -2.3809 | -0.4202 |
| H | 3.5171  | 0.7887  | 1.9265  |
| C | 1.9503  | -3.3683 | 2.5398  |
| N | 1.7008  | -2.8136 | 3.7953  |
| C | 1.4054  | -2.5164 | 1.6215  |
| C | 1.0169  | -1.6447 | 3.6144  |
| N | 0.8191  | -1.4348 | 2.3031  |
| H | 1.9721  | -3.2165 | 4.6857  |
| H | 1.4463  | -2.5570 | 0.5412  |
| H | 0.6949  | -1.0032 | 4.4145  |
| C | -2.8366 | -3.1511 | -0.5297 |
| N | -2.3620 | -2.1750 | -1.2459 |

|    |         |         |         |
|----|---------|---------|---------|
| C  | -3.9745 | -3.7891 | -1.2599 |
| C  | -3.3758 | -1.9294 | -2.3342 |
| N  | -4.2670 | -3.1273 | -2.3373 |
| H  | -4.4823 | -4.6932 | -0.9607 |
| H  | -2.9223 | -1.7397 | -3.3037 |
| S  | 0.3976  | 0.7794  | -0.8232 |
| Cu | -2.0240 | 1.1420  | -0.5218 |
| Cu | -0.7609 | -1.0595 | -1.2568 |
| Cu | 2.5861  | -0.2837 | -1.0166 |
| Cu | 0.0065  | 0.1503  | 1.3550  |
| N  | 1.1001  | -2.5045 | -2.6096 |
| N  | 0.0367  | -2.1451 | -2.9067 |
| O  | 1.8045  | -1.9736 | -1.2676 |
| H  | 2.4957  | -4.2756 | 2.3915  |
| H  | 6.6388  | -2.0905 | 1.8207  |
| H  | -2.5002 | -3.3306 | 0.4838  |
| H  | -3.7776 | -0.7962 | 1.4006  |
| H  | -2.3617 | 1.1413  | 5.8431  |
| H  | 6.2949  | 2.9638  | -2.6228 |
| H  | -2.8488 | 6.2255  | 0.4313  |

**11**

SCF done: -2938.026917

|   |         |         |         |
|---|---------|---------|---------|
| C | 4.2329  | 0.1461  | -0.8819 |
| N | 3.4482  | -0.6743 | -0.2337 |
| C | 5.3995  | -0.5919 | -1.4296 |
| C | 3.9401  | -2.0652 | -0.6290 |
| N | 5.2843  | -1.8695 | -1.2273 |
| H | 6.2573  | -0.1416 | -1.9065 |
| H | 3.9436  | -2.7736 | 0.1945  |
| C | 2.3763  | 4.8914  | 0.8925  |
| N | 2.1529  | 4.4932  | 2.2085  |
| C | 1.7922  | 3.9426  | 0.1029  |
| C | 1.4437  | 3.3233  | 2.1891  |
| N | 1.2028  | 2.9648  | 0.9215  |
| H | 2.4591  | 4.9940  | 3.0362  |
| H | 1.7392  | 3.8874  | -0.9685 |
| H | 1.1451  | 2.7772  | 3.0645  |
| C | 2.7987  | 0.3212  | 5.1011  |
| N | 1.5338  | -0.2659 | 5.1373  |
| C | 3.1601  | 0.3592  | 3.7810  |
| C | 1.1566  | -0.5660 | 3.8614  |
| N | 2.1236  | -0.1950 | 3.0076  |
| H | 1.0005  | -0.4632 | 5.9777  |
| H | 4.0694  | 0.7213  | 3.3367  |
| H | 0.2207  | -1.0161 | 3.5820  |
| C | -5.3109 | -2.1879 | 2.6112  |
| N | -4.6879 | -3.4179 | 2.3921  |
| C | -4.6769 | -1.2945 | 1.7937  |
| C | -3.7037 | -3.2458 | 1.4617  |
| N | -3.6710 | -1.9621 | 1.0779  |
| H | -4.9418 | -4.2957 | 2.8327  |
| H | -4.8680 | -0.2493 | 1.6507  |
| H | -3.0584 | -4.0238 | 1.0971  |
| C | -5.5883 | 1.7339  | -1.4785 |
| N | -4.9035 | 2.4700  | -0.5107 |
| C | -4.9325 | 0.5330  | -1.5707 |
| C | -3.8643 | 1.7056  | -0.0486 |
| N | -3.8527 | 0.5226  | -0.6716 |
| H | -5.1520 | 3.4007  | -0.1950 |
| H | -5.1477 | -0.3093 | -2.2027 |
| H | -3.1570 | 2.0342  | 0.6906  |
| C | -1.8884 | 2.5420  | -3.4544 |
| N | -1.6140 | 3.8352  | -3.0066 |
| C | -1.4183 | 1.6880  | -2.4979 |
| C | -0.9859 | 3.7418  | -1.7971 |
| N | -0.8477 | 2.4496  | -1.4596 |
| H | -1.8377 | 4.6928  | -3.4997 |
| H | -1.4759 | 0.6080  | -2.4339 |
| H | -0.6593 | 4.5874  | -1.2189 |
| C | 2.6830  | -0.8421 | -3.2380 |



|    |         |         |         |
|----|---------|---------|---------|
| N  | 2.1020  | -1.3657 | -2.1923 |
| C  | 3.6677  | -1.8136 | -3.7975 |
| C  | 2.9423  | -2.5716 | -1.8353 |
| N  | 3.7876  | -2.8550 | -3.0309 |
| H  | 4.2005  | -1.6971 | -4.7290 |
| H  | 2.3464  | -3.4216 | -1.5185 |
| S  | -0.4269 | -0.5342 | 0.8514  |
| Cu | 1.9718  | -0.4059 | 1.0319  |
| Cu | 0.3736  | -1.0829 | -1.2737 |
| Cu | -2.4678 | -1.1393 | -0.2913 |
| Cu | -0.0349 | 1.5915  | 0.1732  |
| N  | -0.9194 | -4.2932 | -0.2327 |
| N  | 0.0677  | -4.0382 | -0.6728 |
| O  | -1.4025 | -1.2472 | -1.7800 |
| H  | -2.3890 | 2.3283  | -4.3742 |
| H  | -6.4538 | 2.1198  | -1.9867 |
| H  | 2.5313  | 0.1898  | -3.5325 |
| H  | 3.9714  | 1.1699  | -1.1115 |
| H  | 2.8932  | 5.7872  | 0.6242  |
| H  | -6.1271 | -2.0499 | 3.2969  |
| H  | 3.3105  | 0.6456  | 5.9874  |

**Int<sub>1</sub>\_C**

SCF done: -3347.143245

|   |         |         |         |
|---|---------|---------|---------|
| C | -1.7832 | 0.3357  | 4.4358  |
| C | -2.9850 | 0.6746  | 3.6376  |
| N | -2.9664 | 1.2231  | 2.4052  |
| C | -4.3771 | 0.5934  | 4.0349  |
| C | -4.3041 | 1.4362  | 2.0923  |
| N | -5.1597 | 1.0853  | 3.0840  |
| H | -1.6429 | 1.0788  | 5.2362  |
| H | -0.8796 | 0.3142  | 3.8213  |
| H | -4.7704 | 0.2171  | 4.9762  |
| H | -4.6032 | 2.0490  | 1.2489  |
| C | 2.2538  | -0.3773 | 6.1508  |
| C | 2.0083  | 0.2180  | 4.8122  |
| N | 2.1060  | 1.5734  | 4.5382  |
| C | 1.6286  | -0.3450 | 3.6171  |
| C | 1.7911  | 1.7927  | 3.2378  |
| N | 1.4922  | 0.6382  | 2.6456  |
| H | 1.5286  | -0.0187 | 6.8925  |
| H | 3.2582  | -0.1367 | 6.5228  |
| H | 2.3990  | 2.2877  | 5.1999  |
| H | 1.4340  | -1.3874 | 3.4010  |
| H | 1.7834  | 2.7697  | 2.7738  |
| C | -0.7922 | 6.5387  | 3.7588  |
| C | -0.8205 | 5.4559  | 2.7481  |
| N | -0.4189 | 5.6293  | 1.4329  |
| C | -1.2130 | 4.1410  | 2.8198  |
| C | -0.5697 | 4.4637  | 0.7612  |
| N | -1.0485 | 3.5340  | 1.5856  |
| H | -1.4777 | 7.3537  | 3.4924  |
| H | 0.2112  | 6.9692  | 3.8677  |
| H | -0.1047 | 6.5071  | 1.0271  |
| H | -1.6252 | 3.6118  | 3.6688  |
| H | -0.3337 | 4.3246  | -0.2851 |
| C | 3.2448  | 4.2077  | -5.8762 |
| C | 2.3946  | 3.4166  | -4.9554 |
| N | 1.0092  | 3.4489  | -4.9577 |
| C | 2.7164  | 2.5444  | -3.9442 |
| C | 0.5410  | 2.6335  | -3.9823 |
| N | 1.5631  | 2.0671  | -3.3433 |
| H | 3.0672  | 3.9410  | -6.9261 |
| H | 4.3005  | 4.0251  | -5.6588 |
| H | 0.4350  | 3.9902  | -5.5991 |
| H | 3.7006  | 2.2352  | -3.6192 |
| H | -0.5088 | 2.4864  | -3.7661 |
| C | 5.4458  | -2.3813 | -4.1722 |
| C | 4.7664  | -1.4281 | -3.2518 |
| N | 5.4424  | -0.6284 | -2.3437 |
| C | 3.4417  | -1.0994 | -3.0753 |

|    |         |         |         |
|----|---------|---------|---------|
| C  | 4.5502  | 0.1359  | -1.6654 |
| N  | 3.3151  | -0.1312 | -2.0885 |
| H  | 4.7069  | -2.9050 | -4.7856 |
| H  | 6.0252  | -3.1343 | -3.6229 |
| H  | 6.4517  | -0.5952 | -2.2250 |
| H  | 2.5811  | -1.4933 | -3.5999 |
| H  | 4.8302  | 0.8539  | -0.9062 |
| C  | 2.1868  | -4.7303 | -1.3402 |
| C  | 2.2106  | -3.5320 | -0.4801 |
| N  | 3.2409  | -3.2172 | 0.3892  |
| C  | 1.3228  | -2.4937 | -0.3672 |
| C  | 2.9643  | -2.0339 | 0.9897  |
| N  | 1.8001  | -1.5693 | 0.5449  |
| H  | 1.2334  | -4.7918 | -1.8719 |
| H  | 2.3034  | -5.6581 | -0.7649 |
| H  | 4.0549  | -3.7966 | 0.5771  |
| H  | 0.3796  | -2.3580 | -0.8849 |
| H  | 3.6112  | -1.5567 | 1.7144  |
| C  | -5.1062 | -4.6653 | -4.1152 |
| C  | -4.1244 | -3.5351 | -3.8308 |
| N  | -3.7817 | -3.3650 | -2.3818 |
| H  | -6.0626 | -4.5086 | -3.6009 |
| H  | -4.7008 | -5.6370 | -3.8054 |
| H  | -3.1790 | -3.7002 | -4.3635 |
| H  | -4.5269 | -2.5741 | -4.1741 |
| H  | -2.7247 | -2.4086 | -2.1153 |
| H  | -3.5000 | -4.2764 | -2.0042 |
| H  | -4.6336 | -3.1176 | -1.8659 |
| C  | -2.0512 | -2.7953 | 1.8108  |
| C  | -3.2781 | -2.0292 | 1.4896  |
| N  | -3.3385 | -1.0474 | 0.5665  |
| C  | -4.6119 | -2.1759 | 2.0200  |
| C  | -4.6578 | -0.6119 | 0.5873  |
| N  | -5.4438 | -1.3189 | 1.4314  |
| H  | -2.1880 | -3.3905 | 2.7195  |
| H  | -1.1888 | -2.1291 | 1.9491  |
| H  | -4.9458 | -2.8930 | 2.7654  |
| H  | -5.0525 | 0.0655  | -0.1629 |
| S  | -0.3428 | 1.2517  | -0.7064 |
| O  | -1.8494 | -1.7249 | -1.9256 |
| Cu | -1.5271 | 1.6497  | 1.1440  |
| Cu | -1.8781 | -0.3073 | -0.4643 |
| Cu | 1.6108  | 0.8378  | -1.7621 |
| Cu | 0.9870  | 0.2288  | 0.7475  |
| H  | 3.0623  | 5.2847  | -5.7688 |
| H  | 6.1330  | -1.8605 | -4.8513 |
| H  | -1.1045 | 6.1541  | 4.7336  |
| H  | 2.1703  | -1.4663 | 6.0990  |
| H  | -1.9048 | -0.6317 | 4.9393  |
| H  | -1.7923 | -3.4894 | 0.9978  |
| H  | -5.3129 | -4.7203 | -5.1904 |
| H  | 2.9891  | -4.7076 | -2.0915 |
| H  | -1.5672 | -1.3853 | -2.7913 |

**Int<sub>2</sub>\_C**

SCF done: -3347.669073

|   |         |         |        |
|---|---------|---------|--------|
| C | -2.0220 | -0.5916 | 3.8461 |
| C | -3.1580 | 0.0652  | 3.1768 |
| N | -3.0465 | 1.0824  | 2.2865 |
| C | -4.5774 | -0.0409 | 3.5008 |
| C | -4.3421 | 1.5203  | 2.0976 |
| N | -5.2714 | 0.8682  | 2.8248 |
| H | -1.7611 | 0.0178  | 4.7311 |
| H | -1.1246 | -0.6281 | 3.2276 |
| H | -5.0381 | -0.7105 | 4.2233 |
| H | -4.5816 | 2.3544  | 1.4436 |
| C | 2.2589  | -0.3433 | 6.1787 |
| C | 2.0209  | 0.2505  | 4.8422 |
| N | 2.1385  | 1.6025  | 4.5645 |
| C | 1.6470  | -0.3139 | 3.6451 |
| C | 1.8445  | 1.8238  | 3.2620 |

|   |         |         |         |                          |              |         |         |
|---|---------|---------|---------|--------------------------|--------------|---------|---------|
| N | 1.5376  | 0.6680  | 2.6708  | O                        | -2.2601      | -0.5230 | -2.2627 |
| H | 1.5368  | 0.0242  | 6.9193  | Cu                       | -1.5334      | 1.7658  | 1.2238  |
| H | 3.2632  | -0.1054 | 6.5530  | Cu                       | -1.4684      | -0.0785 | -0.4247 |
| H | 2.4397  | 2.3136  | 5.2279  | Cu                       | 1.7436       | 0.9511  | -1.6996 |
| H | 1.4596  | -1.3578 | 3.4302  | Cu                       | 1.2056       | 0.3030  | 0.7387  |
| H | 1.8707  | 2.7976  | 2.7918  | H                        | 3.2729       | 5.3113  | -5.6004 |
| C | -0.7871 | 6.5727  | 3.7867  | H                        | 6.1640       | -1.8739 | -4.8310 |
| C | -0.9490 | 5.5500  | 2.7444  | H                        | -0.8801      | 6.1228  | 4.7788  |
| N | -0.8788 | 5.8130  | 1.3889  | H                        | 2.1697       | -1.4319 | 6.1326  |
| C | -1.1890 | 4.2003  | 2.8324  | H                        | -2.2835      | -1.5717 | 4.2470  |
| C | -1.0621 | 4.6640  | 0.7018  | H                        | -1.7618      | -3.6294 | 1.3394  |
| N | -1.2533 | 3.6637  | 1.5614  | H                        | -4.5463      | -4.4824 | -5.4979 |
| H | -1.5525 | 7.3566  | 3.7085  | H                        | 3.0375       | -4.7810 | -2.0080 |
| H | 0.1918  | 7.0657  | 3.7282  | H                        | -2.5884      | 0.2826  | -2.7030 |
| H | -0.7455 | 6.7339  | 0.9763  | H                        | -1.6087      | -0.8754 | -2.8962 |
| H | -1.3439 | 3.6030  | 3.7215  |                          |              |         |         |
| H | -1.0477 | 4.5905  | -0.3764 |                          |              |         |         |
| C | 3.2499  | 4.2417  | -5.8483 | <b>Int<sub>1</sub>_D</b> |              |         |         |
| C | 2.4115  | 3.4852  | -4.8958 | SCF done:                | -3347.180754 |         |         |
| N | 1.0631  | 3.7207  | -4.6934 | C                        | -1.6000      | 0.6072  | 4.6467  |
| C | 2.7213  | 2.4665  | -4.0248 | C                        | -2.8254      | 0.7317  | 3.8197  |
| C | 0.6016  | 2.8860  | -3.7348 | N                        | -2.8626      | 1.2084  | 2.5458  |
| N | 1.5949  | 2.1046  | -3.3058 | C                        | -4.1740      | 0.3778  | 4.1566  |
| H | 2.8834  | 4.1468  | -6.8783 | C                        | -4.1907      | 1.1297  | 2.1768  |
| H | 4.2780  | 3.8712  | -5.8244 | N                        | -4.9955      | 0.6289  | 3.1250  |
| H | 0.5058  | 4.4064  | -5.1991 | H                        | -1.7222      | 1.1378  | 5.6017  |
| H | 3.6749  | 1.9769  | -3.8867 | H                        | -0.7217      | 1.0060  | 4.1305  |
| H | -0.4182 | 2.8787  | -3.3762 | H                        | -4.5336      | -0.0321 | 5.0967  |
| C | 5.4509  | -2.3473 | -4.1443 | H                        | -4.5400      | 1.4552  | 1.2026  |
| C | 4.8270  | -1.3511 | -3.2362 | C                        | 2.4370       | -0.1058 | 6.3617  |
| N | 5.5383  | -0.5483 | -2.3597 | C                        | 2.3179       | 0.4848  | 5.0132  |
| C | 3.5140  | -0.9857 | -3.0455 | N                        | 2.7162       | 1.7690  | 4.6815  |
| C | 4.6821  | 0.2553  | -1.6848 | C                        | 1.8005       | -0.0291 | 3.8516  |
| N | 3.4315  | 0.0068  | -2.0793 | C                        | 2.4356       | 1.9982  | 3.3740  |
| H | 4.6830  | -2.8358 | -4.7510 | N                        | 1.8747       | 0.9152  | 2.8421  |
| H | 5.9904  | -3.1245 | -3.5885 | H                        | 1.8676       | 0.4646  | 7.1076  |
| H | 6.5518  | -0.5378 | -2.2614 | H                        | 3.4798       | -0.1449 | 6.7031  |
| H | 2.6377  | -1.3691 | -3.5512 | H                        | 3.1690       | 2.4274  | 5.3104  |
| H | 4.9946  | 0.9887  | -0.9535 | H                        | 1.3585       | -1.0040 | 3.6911  |
| C | 2.1919  | -4.6963 | -1.3123 | H                        | 2.6379       | 2.9310  | 2.8643  |
| C | 2.2940  | -3.4871 | -0.4730 | C                        | -0.6090      | 6.8102  | 3.9697  |
| N | 3.3125  | -3.2347 | 0.4299  | C                        | -0.8644      | 5.7323  | 2.9756  |
| C | 1.4938  | -2.3766 | -0.4092 | N                        | -0.9865      | 5.9708  | 1.6169  |
| C | 3.1166  | -2.0210 | 0.9987  | C                        | -1.0310      | 4.3712  | 3.1033  |
| N | 2.0094  | -1.4723 | 0.5020  | C                        | -1.2089      | 4.8013  | 0.9729  |
| H | 1.2745  | -4.6654 | -1.9068 | N                        | -1.2412      | 3.8050  | 1.8558  |
| H | 2.1683  | -5.6162 | -0.7141 | H                        | -1.4091      | 7.5624  | 3.9631  |
| H | 4.0774  | -3.8685 | 0.6528  | H                        | 0.3407       | 7.3252  | 3.7747  |
| H | 0.5911  | -2.1718 | -0.9703 | H                        | -0.9487      | 6.8866  | 1.1775  |
| H | 3.7716  | -1.5878 | 1.7434  | H                        | -1.0398      | 3.7807  | 4.0099  |
| C | -4.5195 | -4.2691 | -4.4234 | H                        | -1.3360      | 4.7091  | -0.0970 |
| C | -4.1460 | -2.8267 | -4.2112 | C                        | 3.4280       | 4.4792  | -5.6653 |
| N | -4.1260 | -2.5003 | -2.7238 | C                        | 2.3584       | 3.5939  | -5.1480 |
| H | -5.5228 | -4.4929 | -4.0385 | N                        | 1.0378       | 3.6360  | -5.5665 |
| H | -3.8007 | -4.9579 | -3.9634 | C                        | 2.3919       | 2.5954  | -4.2104 |
| H | -3.1400 | -2.6009 | -4.5778 | C                        | 0.3276       | 2.6955  | -4.9001 |
| H | -4.8527 | -2.1305 | -4.6721 | N                        | 1.1316       | 2.0422  | -4.0617 |
| H | -3.5403 | -1.6690 | -2.5375 | H                        | 3.5874       | 4.3378  | -6.7420 |
| H | -3.7302 | -3.2885 | -2.1946 | H                        | 4.3715       | 4.2617  | -5.1569 |
| H | -5.0685 | -2.3346 | -2.3395 | H                        | 0.6642       | 4.2628  | -6.2747 |
| C | -1.9793 | -2.7069 | 1.9050  | H                        | 3.2446       | 2.2357  | -3.6532 |
| C | -3.0884 | -1.9784 | 1.2488  | H                        | -0.7285      | 2.5150  | -5.0487 |
| N | -2.9357 | -1.1047 | 0.2042  | C                        | 5.6290       | -2.1098 | -3.9613 |
| C | -4.4967 | -2.1326 | 1.4393  | C                        | 4.5472       | -1.2933 | -3.3539 |
| C | -4.2208 | -0.7304 | -0.1275 | N                        | 4.7510       | -0.4511 | -2.2730 |
| N | -5.1767 | -1.3697 | 0.5544  | C                        | 3.2118       | -1.1498 | -3.6556 |
| H | -2.2430 | -3.0351 | 2.9107  | C                        | 3.5821       | 0.1614  | -1.9581 |
| H | -1.0494 | -2.1333 | 1.9151  | N                        | 2.6232       | -0.2512 | -2.7814 |
| H | -5.0044 | -2.8021 | 2.1290  | H                        | 5.2366       | -2.6827 | -4.8063 |
| H | -4.4284 | 0.0164  | -0.8893 | H                        | 6.0569       | -2.8201 | -3.2421 |
| S | -0.0721 | 1.5826  | -0.5487 | H                        | 5.6414       | -0.2981 | -1.8085 |
|   |         |         |         | H                        | 2.6529       | -1.6324 | -4.4474 |

|                          |         |         |         |    |         |         |         |
|--------------------------|---------|---------|---------|----|---------|---------|---------|
| H                        | 3.4673  | 0.8673  | -1.1463 | C  | -0.7169 | 6.8076  | 3.8977  |
| C                        | 2.3700  | -4.4588 | -1.1293 | C  | -0.7525 | 5.7211  | 2.9019  |
| C                        | 2.3709  | -3.2578 | -0.2637 | N  | -0.2711 | 5.8547  | 1.6108  |
| N                        | 3.2784  | -3.0396 | 0.7620  | C  | -1.2184 | 4.4327  | 2.9721  |
| C                        | 1.5734  | -2.1414 | -0.2672 | C  | -0.4471 | 4.6879  | 0.9476  |
| C                        | 3.0187  | -1.8396 | 1.3349  | N  | -1.0194 | 3.8019  | 1.7575  |
| N                        | 1.9824  | -1.2664 | 0.7246  | H  | -1.2446 | 7.7029  | 3.5442  |
| H                        | 1.5769  | -4.3775 | -1.8783 | H  | 0.3116  | 7.1053  | 4.1436  |
| H                        | 2.1986  | -5.3815 | -0.5586 | H  | 0.1138  | 6.7084  | 1.2159  |
| H                        | 4.0028  | -3.6873 | 1.0604  | H  | -1.7037 | 3.9359  | 3.8022  |
| H                        | 0.7562  | -1.8957 | -0.9346 | H  | -0.1657 | 4.5190  | -0.0825 |
| H                        | 3.5758  | -1.4317 | 2.1683  | C  | 3.3201  | 4.4766  | -5.7373 |
| C                        | -4.9230 | -4.3938 | -3.9043 | C  | 2.4759  | 3.8224  | -4.7099 |
| C                        | -5.6681 | -5.1617 | -2.8270 | N  | 1.2001  | 4.2411  | -4.3708 |
| N                        | -6.2828 | -4.2200 | -1.8305 | C  | 2.7103  | 2.7378  | -3.9020 |
| H                        | -4.0968 | -3.8098 | -3.4828 | C  | 0.7117  | 3.4323  | -3.3975 |
| H                        | -5.5930 | -3.7247 | -4.4590 | N  | 1.6157  | 2.5056  | -3.0876 |
| H                        | -6.4613 | -5.7855 | -3.2542 | H  | 2.8419  | 4.4659  | -6.7252 |
| H                        | -4.9930 | -5.8165 | -2.2653 | H  | 4.2759  | 3.9543  | -5.8255 |
| H                        | -6.7803 | -4.7374 | -1.0964 | H  | 0.7064  | 5.0242  | -4.7908 |
| H                        | -6.9805 | -3.6198 | -2.2858 | H  | 3.5957  | 2.1180  | -3.8617 |
| H                        | -5.4575 | -3.5288 | -1.3213 | H  | -0.2664 | 3.5409  | -2.9477 |
| C                        | -1.8680 | -2.5238 | 2.0217  | C  | 5.5211  | -2.1124 | -4.0333 |
| C                        | -2.7888 | -2.4056 | 0.8609  | C  | 4.8004  | -1.1393 | -3.1687 |
| N                        | -2.7023 | -1.4289 | -0.1164 | N  | 5.4391  | -0.2110 | -2.3599 |
| C                        | -3.8437 | -3.2378 | 0.5116  | C  | 3.4605  | -0.9119 | -2.9629 |
| C                        | -3.6898 | -1.7080 | -1.0046 | C  | 4.5067  | 0.5317  | -1.7111 |
| N                        | -4.3995 | -2.7962 | -0.6602 | N  | 3.2869  | 0.1256  | -2.0582 |
| H                        | -2.3323 | -3.1096 | 2.8226  | H  | 4.8034  | -2.7341 | -4.5763 |
| H                        | -1.6160 | -1.5326 | 2.4202  | H  | 6.1727  | -2.7761 | -3.4508 |
| H                        | -4.2214 | -4.1078 | 1.0370  | H  | 6.4454  | -0.0922 | -2.2788 |
| H                        | -3.8923 | -1.1025 | -1.8814 | H  | 2.6111  | -1.4172 | -3.4034 |
| S                        | -0.0563 | 1.7076  | -0.2922 | H  | 4.7478  | 1.3337  | -1.0257 |
| Cu                       | -1.4786 | 1.8674  | 1.3571  | C  | 2.2621  | -4.4614 | -1.2013 |
| Cu                       | -1.3914 | -0.0194 | -0.4061 | C  | 2.3565  | -3.2475 | -0.3694 |
| Cu                       | 0.7508  | 0.4768  | -2.9477 | N  | 3.4470  | -2.9032 | 0.4112  |
| Cu                       | 1.1822  | 0.5291  | 1.0305  | C  | 1.4730  | -2.2137 | -0.2130 |
| H                        | 3.1957  | 5.5390  | -5.4984 | C  | 3.2069  | -1.7047 | 1.0005  |
| H                        | 6.4453  | -1.4808 | -4.3394 | N  | 2.0088  | -1.2609 | 0.6315  |
| H                        | -0.5634 | 6.3880  | 4.9775  | H  | 1.2915  | -4.4927 | -1.7035 |
| H                        | 2.0498  | -1.1289 | 6.3588  | H  | 2.3588  | -5.3809 | -0.6090 |
| H                        | -1.4056 | -0.4435 | 4.9057  | H  | 4.2808  | -3.4679 | 0.5477  |
| H                        | -0.9275 | -3.0215 | 1.7418  | H  | 0.4981  | -2.0966 | -0.6673 |
| H                        | -4.5060 | -5.1014 | -4.6293 | H  | 3.8957  | -1.2062 | 1.6698  |
| H                        | 3.3224  | -4.5747 | -1.6634 | C  | -5.0309 | -4.3964 | -3.9763 |
| O                        | -0.7294 | -0.4905 | -2.2346 | C  | -5.9390 | -5.0932 | -2.9763 |
| H                        | -1.1346 | -1.2569 | -2.6712 | N  | -6.5056 | -4.1040 | -1.9931 |
| <b>Int<sub>2</sub>_D</b> |         |         |         |    |         |         |         |
| SCF done: -3347.717189   |         |         |         |    |         |         |         |
| C                        | -1.7079 | 0.6046  | 4.5747  | H  | -6.7720 | -5.5965 | -3.4790 |
| C                        | -2.9093 | 0.6007  | 3.7019  | H  | -5.3914 | -5.8394 | -2.3916 |
| N                        | -2.9464 | 1.1367  | 2.4470  | H  | -7.0918 | -4.5739 | -1.2949 |
| C                        | -4.2125 | 0.0873  | 3.9606  | H  | -7.1109 | -3.4281 | -2.4737 |
| C                        | -4.2463 | 0.9249  | 2.0144  | H  | -5.6485 | -3.5441 | -1.4550 |
| N                        | -5.0202 | 0.2912  | 2.8961  | C  | -1.9759 | -2.5264 | 1.9497  |
| H                        | -1.7852 | 1.3857  | 5.3477  | C  | -2.8618 | -2.4943 | 0.7564  |
| H                        | -0.7963 | 0.7800  | 3.9954  | N  | -2.7765 | -1.5287 | -0.2364 |
| H                        | -4.5658 | -0.3977 | 4.8660  | C  | -3.9136 | -3.3293 | 0.4143  |
| H                        | -4.5897 | 1.2588  | 1.0406  | C  | -3.7701 | -1.8175 | -1.1195 |
| C                        | 2.3291  | -0.1084 | 6.2897  | N  | -4.4739 | -2.9001 | -0.7653 |
| C                        | 2.0833  | 0.4739  | 4.9451  | H  | -2.2085 | -3.3962 | 2.5736  |
| N                        | 2.1399  | 1.8328  | 4.6754  | H  | -2.1102 | -1.6248 | 2.5635  |
| C                        | 1.7408  | -0.0990 | 3.7428  | H  | -4.2903 | -4.1929 | 0.9506  |
| C                        | 1.8365  | 2.0447  | 3.3713  | H  | -3.9699 | -1.2258 | -2.0062 |
| N                        | 1.5843  | 0.8820  | 2.7737  | S  | -0.2484 | 1.6180  | -0.4594 |
| H                        | 1.5869  | 0.2349  | 7.0214  | Cu | -1.5629 | 1.9596  | 1.3887  |
| H                        | 3.3237  | 0.1580  | 6.6704  | Cu | -1.6251 | -0.0376 | -0.2942 |
| H                        | 2.3986  | 2.5532  | 5.3443  | Cu | 1.5324  | 1.0095  | -1.7312 |
| H                        | 1.5820  | -1.1460 | 3.5200  | Cu | 1.1302  | 0.4846  | 0.8558  |
| H                        | 1.8031  | 3.0216  | 2.9086  | H  | 3.5333  | 5.5230  | -5.4821 |
|                          |         |         |         | H  | 6.1458  | -1.6013 | -4.7780 |

|   |         |         |         |
|---|---------|---------|---------|
| H | -1.1996 | 6.4852  | 4.8245  |
| H | 2.2729  | -1.1997 | 6.2424  |
| H | -1.6068 | -0.3478 | 5.1099  |
| H | -0.9143 | -2.5892 | 1.6694  |
| H | -4.6495 | -5.1355 | -4.6893 |
| H | 3.0424  | -4.4854 | -1.9749 |
| O | 0.3126  | -0.5017 | -3.1440 |
| H | -0.5862 | -0.5639 | -2.7706 |
| H | 0.1902  | -0.0647 | -4.0058 |

**H<sub>2</sub>O**

SCF done: -76.4089533

|   |        |        |        |
|---|--------|--------|--------|
| O | 0.4043 | 0.2268 | 0.0000 |
| H | 1.3643 | 0.2268 | 0.0000 |
| H | 0.0838 | 1.1317 | 0.0000 |

**N<sub>2</sub>O**

SCF done: -184.6602738

|   |        |        |         |
|---|--------|--------|---------|
| N | 0.0000 | 0.0000 | 0.0692  |
| N | 0.0000 | 0.0000 | 1.2021  |
| O | 0.0000 | 0.0000 | -1.1124 |

**N<sub>2</sub>**

SCF done: -109.5241291

|   |         |        |        |
|---|---------|--------|--------|
| N | 0.4043  | 0.2268 | 0.0000 |
| N | -0.2326 | 1.3301 | 0.0000 |

**H**

SCF done: -0.5002728

|   |        |        |        |
|---|--------|--------|--------|
| H | 0.7396 | 0.7396 | 0.0000 |
|---|--------|--------|--------|
